# Supplementary material for: Social Interactions in Two Groups of Zoo-Housed Adult Female Asian Elephants (Elephas maximus) that Differ in Relatedness
Source: Animals (Basel). 2018 Aug 1;8(8):132. doi: 10.3390/ani8080132 (PMC6115912; doi:10.3390/ani8080132)
Supplement: Supplementary file 1 [file animals-08-00132-s001.zip › animals-329114-SI.pdf]

## Social Interactions in Two Groups of Zoo-Housed Adult Female Asian Elephants (*Elephas Maximus*) that Differ in Relatedness

Naomi D. Harvey, Carolyn Daly, Natasha Clark, Eleanor Ransford, Stefanie Wallace and Lisa Yon \*

School of Veterinary Medicine and Science, The University of Nottingham, Leicestershire, LE12 5RD, UK; Naomi.Harvey@nottingham.ac.uk (N.D.H.); svycad@nottingham.ac.uk (C.D.); svync2@nottingham.ac.uk (N.C.); svyer1@nottingham.ac.uk (E.R.); Stefanie Wallace (svysaw@nottingham.ac.uk (S.W.)

\* Correspondence: Lisa.Yon@nottingham.ac.uk; Tel.: +44-115-951-6358

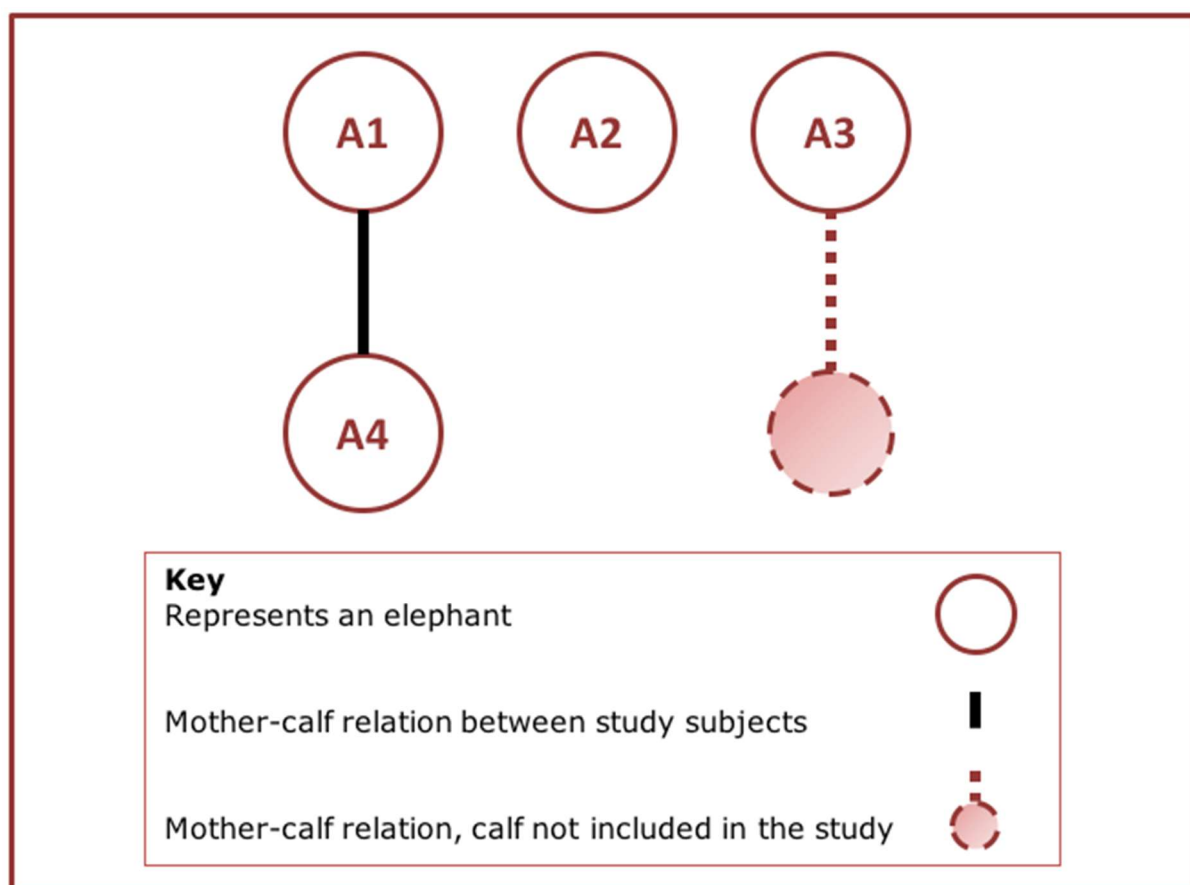

**Figure S1.** Visual depiction of group relatedness at Zoo A. A1–A4 represent the study subjects. A1 and A4 were mother and daughter. A3's calf, was not included in the study but is indicated on the diagram.

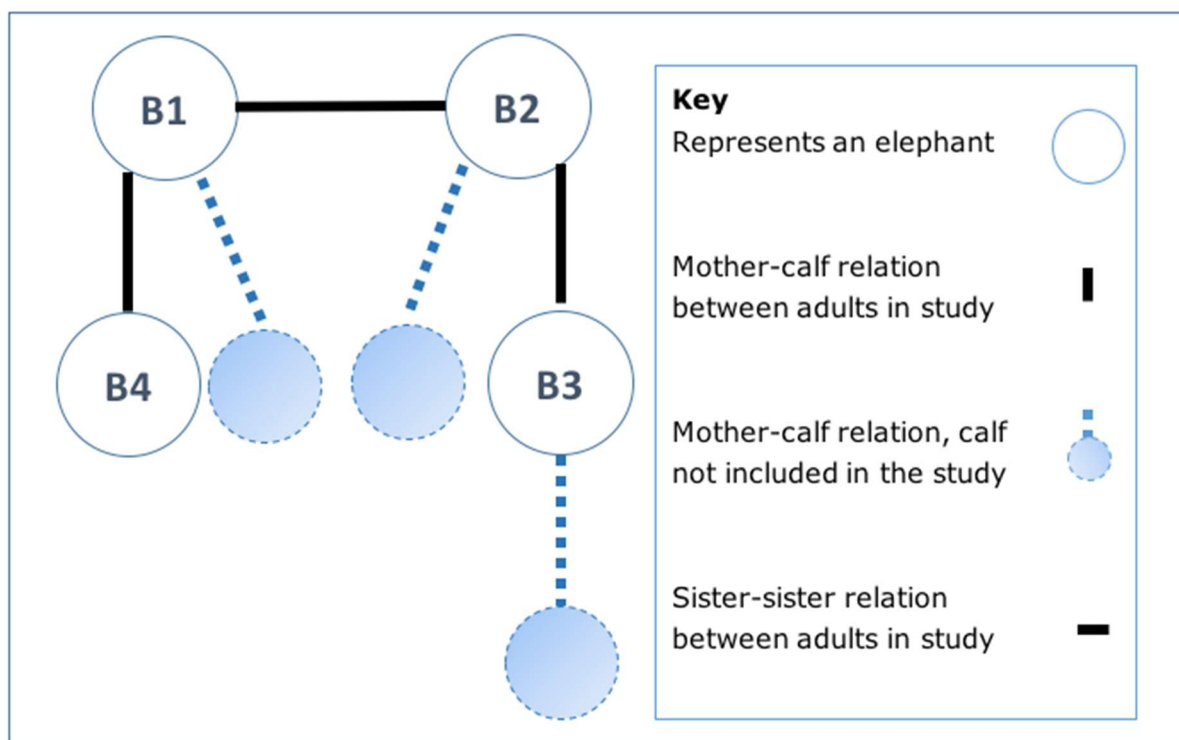

**Figure S2.** Visual depiction of group relatedness at Zoo B. B1-B4 represent the study subjects. B1 and B2 were full sisters and B4 and B3 their daughters, meaning that B4 and B3 are cousins. The three calves not included in this study are indicated on the diagram.

**Table S1.** Original social behaviour ethogram tested during live observation pilots at both study Zoo's.

| Valence     | Behaviour         | Code | Descriptions                                                                                                                                                                                                                                      |
|-------------|-------------------|------|---------------------------------------------------------------------------------------------------------------------------------------------------------------------------------------------------------------------------------------------------|
| Affiliative | Leaning           | Lean | Leaning on another elephant                                                                                                                                                                                                                       |
| Affiliative | Lying interaction | Ly   | Standing over another elephant - usually one that is lying down or young; Placing at least one foot on top of another elephant - usually one that is lying down; Sitting in a crouched position on top of another elephant which is in lying rest |
| Affiliative | Trunk touch       | TT   | Putting the trunk in the mouth of another elephant; Touching another elephant, not the mouth or genitals, with the trunk in a non-aggressive manner; Touching the genital area of another elephant with the trunk;                                |
| Affiliative | Trunk hold        | TH   | Intertwining of trunks between two elephants                                                                                                                                                                                                      |
| Affiliative | Body rub or Nudge | BR/N | Gentle physical contact between two elephants which may be head-head, head-body or body-body (not including touching with trunk); Rubbing the body against another elephant                                                                       |
| Affiliative | Approach          | Ap   | Moving in a non-aggressive manner, within one body length of another elephant                                                                                                                                                                     |
| Affiliative | Parallel walk     | PW   | Two elephants walking side by side in a non-aggressive manner, for 3 or more steps                                                                                                                                                                |
| Affiliative | Follow            | F    | One elephant walks closely behind (within 2 elephant body lengths) of another elephant                                                                                                                                                            |
| Affiliative | Offer food        | Feed | One elephant pushes a pile of food towards another elephant, looks like an offering of the resource                                                                                                                                               |

|             |                              |        |                                                                                                                                                                                                                                                 |
|-------------|------------------------------|--------|-------------------------------------------------------------------------------------------------------------------------------------------------------------------------------------------------------------------------------------------------|
| Affiliative | Trunk Lift                   | TL     | Trunk is outstretched and raised towards an approaching individual                                                                                                                                                                              |
| Affiliative | Play                         | Play   | Engaging in active play with another elephant, including head to head sparring, trunk wrestling, mounting, chasing, and rolling on one another. Does not include behaviour observed following an antagonistic encounter or as part of courtship |
| Agonistic   | Kick or hit                  | K/H    | Strike out or hit an elephant with a foot in a seemingly aggressive manner - may include kicking of sand towards another elephant; Hitting another elephant with the trunk or tail                                                              |
| Agonistic   | Charge                       | Charge | Move towards another elephant with the head held high, pace usually quickens as individual gets closer to the target elephant                                                                                                                   |
| Agonistic   | Chase                        | Chase  | Charge leading to pursuit of another elephant                                                                                                                                                                                                   |
| Agonistic   | Push                         | Push   | One elephant forces or pushes against the body (usually the rump) of another elephant, resulting in the elephant that is being pushed moving at least two steps                                                                                 |
| Agonistic   | Stand off                    | SO     | Two elephants standing facing in opposite directions with foreheads pushing against each other                                                                                                                                                  |
| Agonistic   | Floor smack                  | FS     | Hitting the trunk on the floor in an aggressive manner, may be accompanied by a 'snort'                                                                                                                                                         |
| Agonistic   | Lunge                        | Lunge  | A lunging motion followed by physical contact, used to prevent another elephant standing up                                                                                                                                                     |
| Agonistic   | Tusking                      | Tusk   | Poking or jabbing at another elephant with the tusk                                                                                                                                                                                             |
| Agonistic   | Directed trunk swing         | TS     | head oriented towards another elephant, human or change in the environment, violently swinging the trunk around in an aggressive display                                                                                                        |
| Agonistic   | Displacement                 | Dis    | Movement of one elephant resulting in another elephant leaving its location (within 10 seconds)                                                                                                                                                 |
| Agonistic   | Aggressive display: standing | AggS   | Facing another elephant in an aggressive posture; head held high, ears wide or flapping                                                                                                                                                         |
| Agonistic   | Aggressive display: walking  | AggW   | Facing another elephant while walking with head bobbing up and down or side to side, ears wide or flapping                                                                                                                                      |
| Agonistic   | Size up                      | SU     | Two elephants directly facing each other, standing as tall as possible, heads raised, and ears spread wide                                                                                                                                      |
| Agonistic   | Bite                         | Bite   | Biting of the body, trunk or tail of another elephant                                                                                                                                                                                           |

**Table S2.** Asymmetric matrices for each zoo used to create weighted digraphs for each social behaviour classification: affiliative (a1,2); agonistic (b1,2); and non-contact displacement (c1,2). Values were formed by combining the 5 hour adjusted interaction sums from the Spring and Autumn observations to represent 10 hours of observations.

(a1) Zoo A: 10h Affiliative Matrix

| Initiator | Receiver |    |    |    |
|-----------|----------|----|----|----|
|           | A2       | A3 | A1 | A4 |
| A2        | -        | 17 | 26 | 8  |
| A3        | 8        | -  | 32 | 12 |
| A1        | 10       | 3  | -  | 12 |
| A4        | 5        | 2  | 10 | -  |

(b1) Zoo A: 10h Agonistic Matrix

| Initiator | Receiver |    |    |    |
|-----------|----------|----|----|----|
|           | A2       | A3 | A1 | A4 |
| A2        | -        | 5  | 13 | 6  |
| A3        | 1        | -  | 36 | 6  |
| A1        | 0        | 1  | -  | 1  |
| A4        | 0        | 0  | 0  | -  |

(c1) Zoo A: 10h Non-contact Displacement Matrix

| Initiator | Receiver |    |    |    |
|-----------|----------|----|----|----|
|           | A2       | A3 | A1 | A4 |
| A2        | -        | 8  | 2  | 3  |
| A3        | 0        | -  | 1  | 6  |
| A1        | 0        | 1  | -  | 0  |
| A4        | 0        | 0  | 0  | -  |

(a2) Zoo B: 10h Affiliative Matrix

| Initiator | Receiver |    |    |    |
|-----------|----------|----|----|----|
|           | B1       | B2 | B4 | B3 |
| B1        | -        | 5  | 14 | 8  |
| B2        | 13       | -  | 12 | 9  |
| B4        | 34       | 31 | -  | 24 |
| B3        | 6        | 23 | 26 | -  |

(b2) Zoo B: 10h Agonistic Matrix

| Initiator | Receiver |    |    |    |
|-----------|----------|----|----|----|
|           | B1       | B2 | B4 | B3 |
| B1        | -        | 1  | 2  | 3  |
| B2        | 8        | -  | 3  | 1  |
| B4        | 2        | 0  | -  | 1  |
| B3        | 0        | 3  | 2  | -  |

(c2) Zoo B: 10h Non-contact Displacement Matrix

| Initiator | Receiver |    |    |    |
|-----------|----------|----|----|----|
|           | B1       | B2 | B4 | B3 |
| B1        | -        | 2  | 5  | 16 |
| B2        | 19       | -  | 10 | 2  |
| B4        | 3        | 2  | -  | 1  |
| B3        | 1        | 1  | 3  | -  |

**Table S3.** Minutes in view, strength and strength per 5 hours for each social behaviour classification, for each elephant, at each time point. Aff = affiliative. Ago = agonistic. NCD = non-contact displacement.

| ID | Beh | Spring       |          |              | Autumn       |          |              |
|----|-----|--------------|----------|--------------|--------------|----------|--------------|
|    |     | Min. in View | Strength | 5hr Strength | Min. in View | Strength | 5hr Strength |
| A1 | Aff | 502          | 21       | 13           | 438          | 17       | 12           |
| A2 | Aff | 547          | 26       | 14           | 350          | 43       | 37           |
| A3 | Aff | 397          | 53       | 40           | 364          | 15       | 12           |
| A4 | Aff | 539          | 12       | 7            | 312          | 11       | 11           |
| B1 | Aff | 600          | 34       | 17           | 571          | 18       | 9            |
| B2 | Aff | 558          | 32       | 17           | 489          | 27       | 17           |
| B3 | Aff | 516          | 29       | 17           | 514          | 66       | 39           |
| B4 | Aff | 544          | 62       | 34           | 467          | 85       | 55           |
| A1 | Ago | 502          | 3        | 2            | 438          | 0        | 0            |
| A2 | Ago | 547          | 27       | 15           | 350          | 11       | 9            |
| A3 | Ago | 397          | 19       | 14           | 364          | 34       | 28           |
| A4 | Ago | 539          | 0        | 0            | 312          | 0        | 0            |
| B1 | Ago | 600          | 7        | 4            | 571          | 3        | 2            |
| B2 | Ago | 558          | 16       | 9            | 489          | 6        | 4            |
| B3 | Ago | 516          | 4        | 2            | 514          | 5        | 3            |
| B4 | Ago | 544          | 3        | 2            | 467          | 2        | 1            |
| A1 | NCD | 502          | 1        | 1            | 438          | 0        | 0            |
| A2 | NCD | 547          | 7        | 4            | 350          | 10       | 9            |
| A3 | NCD | 397          | 4        | 3            | 364          | 5        | 4            |
| A4 | NCD | 539          | 0        | 0            | 312          | 0        | 0            |
| B1 | NCD | 600          | 17       | 9            | 571          | 28       | 15           |
| B2 | NCD | 558          | 20       | 11           | 489          | 34       | 21           |
| B3 | NCD | 516          | 7        | 4            | 514          | 2        | 1            |
| B4 | NCD | 544          | 10       | 6            | 467          | 1        | 1            |

**Table S4.** The number and type of social agonistic and affiliative social interactions directed towards elephant A1 by A3 in Zoo A.

| Period | Affiliative                                                                               | Agonistic                                                                                          |
|--------|-------------------------------------------------------------------------------------------|----------------------------------------------------------------------------------------------------|
| Spring | 2 follows; 16 trunk touches; 8 tail holds; 4 leans; 2 body rubs or nudges<br>[Total = 32] | 1 kick/hit; 3 pushes; 1 bite; 12 Other: repetitive nudges<br>[Total = 17]                          |
| Autumn | 1 follow; 9 trunk touches<br>[Total = 10]                                                 | 3 kick/hits; 2 pushes; 1 lunge; 2 tail pulls; 1 block; 19 Other: repetitive nudges<br>[Total = 28] |

**Table S5.** Mean hourly rate for affiliative interactions between all possible dyads of captive female Asian elephants from this study plus two others where data was available: Makecha et al. (2012) [1] where data was given in rates per 1 hour, and Coleing (2009) [2] where data was given as frequencies from 40 hours of observation, which was calculated down to represent a 1-hour rate. \*indicates a dyad containing a juvenile.

| Study   | Dyad          | Elephant 1 | Elephant 2 | Hourly rate | Related? |
|---------|---------------|------------|------------|-------------|----------|
| Makecha | CA:KA         | 0.27       | 0.9        | 1.17        | Yes      |
| Coleing | THW:SITHAMI   | 0          | 82         | 2.05        | Yes      |
| Coleing | THW:SUNDARA * | 0          | 0          | 0           | Yes      |
| Coleing | SUN:SITH *    | 110        | 84         | 4.85        | Yes      |
| Harvey  | A1:A4         | 10         | 12         | 2.2         | Yes      |
| Harvey  | B1:B2         | 5          | 13         | 1.8         | Yes      |
| Harvey  | B1:B3 *       | 8          | 6          | 1.4         | Yes      |
| Harvey  | B1:B4 *       | 14         | 34         | 4.8         | Yes      |
| Harvey  | B2:B3 *       | 9          | 23         | 3.2         | Yes      |
| Harvey  | B2:B4 *       | 12         | 31         | 4.3         | Yes      |
| Harvey  | B3:B4 *       | 26         | 24         | 5           | Yes      |
| Makecha | ME:RO         | 2.36       | 1.37       | 3.73        | No       |
| Makecha | ME:KA         | 0.84       | 2.58       | 3.42        | No       |
| Makecha | ME:SI         | 1.18       | 0.34       | 1.52        | No       |
| Makecha | ME:TI         | 0.21       | 0.27       | 0.48        | No       |
| Makecha | ME:CA         | 0.1        | 0.03       | 0.13        | No       |
| Makecha | TI:KA         | 1.9        | 1.72       | 3.62        | No       |
| Makecha | SI:KA         | 0.37       | 0.34       | 0.71        | No       |
| Makecha | KA:RO         | 0.9        | 0.64       | 1.54        | No       |
| Makecha | RO:CA         | 0.2        | 0.05       | 0.25        | No       |
| Makecha | RO:TI         | 0.17       | 1          | 1.17        | No       |
| Makecha | RO:SI         | 0.05       | 0.35       | 0.4         | No       |
| Makecha | CA:TI         | 0.01       | 0.08       | 0.09        | No       |
| Makecha | CA:SI         | 0.01       | 0.14       | 0.15        | No       |
| Coleing | THW:JAN       | 0          | 0          | 0           | No       |
| Coleing | THW:SHEBA     | 0          | 0          | 0           | No       |
| Coleing | THW:MAYA      | 0          | 0          | 0           | No       |
| Coleing | THW:BIRMA     | 0          | 0          | 0           | No       |
| Coleing | SUN:JAN *     | 66         | 0          | 1.65        | No       |
| Coleing | SUN:MAYA *    | 0          | 0          | 0           | No       |
| Coleing | SUN:BIRMA *   | 0          | 0          | 0           | No       |
| Coleing | SUN:SHEBA *   | 0          | 0          | 0           | No       |
| Coleing | JANG:MAYA     | 0          | 0          | 0           | No       |
| Coleing | JANG:BIRMA    | 0          | 0          | 0           | No       |
| Coleing | JANG:SHEBA    | 0          | 0          | 0           | No       |
| Coleing | JANG:SITH     | 0          | 0          | 0           | No       |
| Coleing | MAYA:SITH     | 0          | 0          | 0           | No       |
| Coleing | MAYA:SHEBA    | 0          | 0          | 0           | No       |
| Coleing | MAYA:BIRMA    | 0          | 0          | 0           | No       |
| Coleing | BIRMA:SHEBA   | 88         | 76         | 4.1         | No       |
| Coleing | BIRMA:SITH    | 0          | 0          | 0           | No       |
| Coleing | SITH:SHEBA    | 0          | 0          | 0           | No       |
| Harvey  | A1:A2         | 10         | 26         | 3.6         | No       |
| Harvey  | A1:A3         | 3          | 32         | 3.5         | No       |
| Harvey  | A2:A3         | 17         | 8          | 2.5         | No       |
| Harvey  | A2:A4         | 8          | 5          | 1.3         | No       |
| Harvey  | A3:A4         | 12         | 2          | 1.4         | No       |

**Table S6.** Mean hourly rate of agonistic interactions between all possible dyads of captive female Asian elephants from this study plus two others where data was available: Makecha et al. (2012) [1] where data was given in rates per 1 hour, and Coleing (2009) [2] where data was given as frequencies from 40 hours of observations, which was calculated down to represent a 1-hour rate. \*indicates a dyad containing a juvenile.

| Study   | Dyad          | Elephant 1 | Elephant 2 | Hourly rate | Related? |
|---------|---------------|------------|------------|-------------|----------|
| Makecha | CA:KA         | 0          | 0          | 0           | Yes      |
| Coleing | THW:SITHAMI   | 0          | 0          | 0           | Yes      |
| Coleing | THW:SUNDARA * | 0          | 0          | 0           | Yes      |
| Coleing | SUN:SITH *    | 0          | 0          | 0           | Yes      |
| Harvey  | A1:A4         | 1          | 0          | 0.1         | Yes      |
| Harvey  | B1:B2         | 1          | 8          | 0.9         | Yes      |
| Harvey  | B1:B3 *       | 3          | 0          | 0.3         | Yes      |
| Harvey  | B1:B4 *       | 2          | 2          | 0.4         | Yes      |
| Harvey  | B2:B3 *       | 3          | 1          | 0.4         | Yes      |
| Harvey  | B2:B4 *       | 3          | 0          | 0.3         | Yes      |
| Harvey  | B3:B4 *       | 2          | 1          | 0.3         | Yes      |
| Makecha | ME:RO         | 1.76       | 0.15       | 1.91        | No       |
| Makecha | ME:KA         | 0.89       | 0          | 0.89        | No       |
| Makecha | ME:SI         | 0.35       | 0.01       | 0.36        | No       |
| Makecha | ME:TI         | 0          | 0          | 0           | No       |
| Makecha | ME:CA         | 0.07       | 0          | 0.07        | No       |
| Makecha | TI:KA         | 0.04       | 0.01       | 0.05        | No       |
| Makecha | SI:KA         | 0          | 0.01       | 0.01        | No       |
| Makecha | KA:RO         | 0.21       | 0.2        | 0.41        | No       |
| Makecha | RO:CA         | 0.12       | 0          | 0.12        | No       |
| Makecha | RO:TI         | 0          | 0.2        | 0.2         | No       |
| Makecha | RO:SI         | 0.01       | 0.28       | 0.29        | No       |
| Makecha | CA:TI         | 0          | 0          | 0           | No       |
| Makecha | CA:SI         | 0          | 0          | 0           | No       |
| Coleing | THW:JAN       | 3          | 0          | 0.075       | No       |
| Coleing | THW:SHEBA     | 0          | 4          | 0.1         | No       |
| Coleing | THW:MAYA      | 0          | 1          | 0.025       | No       |
| Coleing | THW:BIRMA     | 0          | 0          | 0           | No       |
| Coleing | SUN:JAN *     | 0          | 2          | 0.05        | No       |
| Coleing | SUN:MAYA *    | 0          | 0          | 0           | No       |
| Coleing | SUN:BIRMA *   | 0          | 0          | 0           | No       |
| Coleing | SUN:SHEBA *   | 0          | 0          | 0           | No       |
| Coleing | JANG:MAYA     | 0          | 16         | 0.4         | No       |
| Coleing | JANG:BIRMA    | 2          | 0          | 0.05        | No       |
| Coleing | JANG:SHEBA    | 18         | 0          | 0.45        | No       |
| Coleing | JANG:SITH     | 2          | 0          | 0.05        | No       |
| Coleing | MAYA:SITH     | 1          | 0          | 0.025       | No       |
| Coleing | MAYA:SHEBA    | 0          | 20         | 0.5         | No       |
| Coleing | MAYA:BIRMA    | 1          | 0          | 0.025       | No       |
| Coleing | BIRMA:SHEBA   | 0          | 0          | 0           | No       |
| Coleing | BIRMA:SITH    | 0          | 0          | 0           | No       |
| Coleing | SITH:SHEBA    | 0          | 0          | 0           | No       |
| Harvey  | A1:A2         | 0          | 13         | 1.3         | No       |
| Harvey  | A1:A3         | 1          | 36         | 3.7         | No       |
| Harvey  | A2:A3         | 5          | 1          | 0.6         | No       |
| Harvey  | A2:A4         | 6          | 0          | 0.6         | No       |
| Harvey  | A3:A4         | 6          | 0          | 0.6         | No       |

## References

1. Makecha, R.; Fad, O.; Gardens, B.; Stan, U.S.A.; Ii, A.K. The Role of Touch in the Social Interactions of Asian Elephants (*Elephas maximus*). *Int. J. Comp. Psychol.* **2012**, *25*, 60–82.
2. Coleing, A. The application of social network theory to animal behaviour. *Biosci. Horiz.* **2009**, *2*, 32–43, doi:10.1093/biohorizons/hzp008.

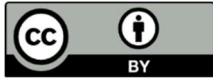

© 2018 by the authors. Licensee MDPI, Basel, Switzerland. This article is an open access article distributed under the terms and conditions of the Creative Commons Attribution (CC BY) license (<http://creativecommons.org/licenses/by/4.0/>).
